# Supplementary material for: Adaptation of time‐driven activity‐based costing to the evaluation of the efficiency of ambulatory care provided in the emergency department
Source: PubMed Central journal article supplement — J Am Coll Emerg Physicians Open. 2022 Jul 18;3(4):e12778. doi: 10.1002/emp2.12778 (PMC9292471; doi:10.1002/emp2.12778), 2022-07-18
Supplement: EMP2-3-e12778-s001.pdf [file EMP2-3-e12778-s001.pdf]

Web-Appendix A1. Panel of experts

| <b>Number of participants</b> | <b>Multidisciplinary team</b> |
|-------------------------------|-------------------------------|
| 3                             | Nurses                        |
| 2                             | Emergency physicians          |
| 1                             | Head nurse                    |
| 1                             | Respiratory therapist         |
| 1                             | Imaging technician            |
| 1                             | Clerk                         |
| 1                             | Nursing assistant             |
| 1                             | Lean management consultant    |
| 1                             | External medicine student     |
| 1                             | Financial management officer  |

Web-Appendix A2. Screen capture of time-motion software Laubress UmtPlus

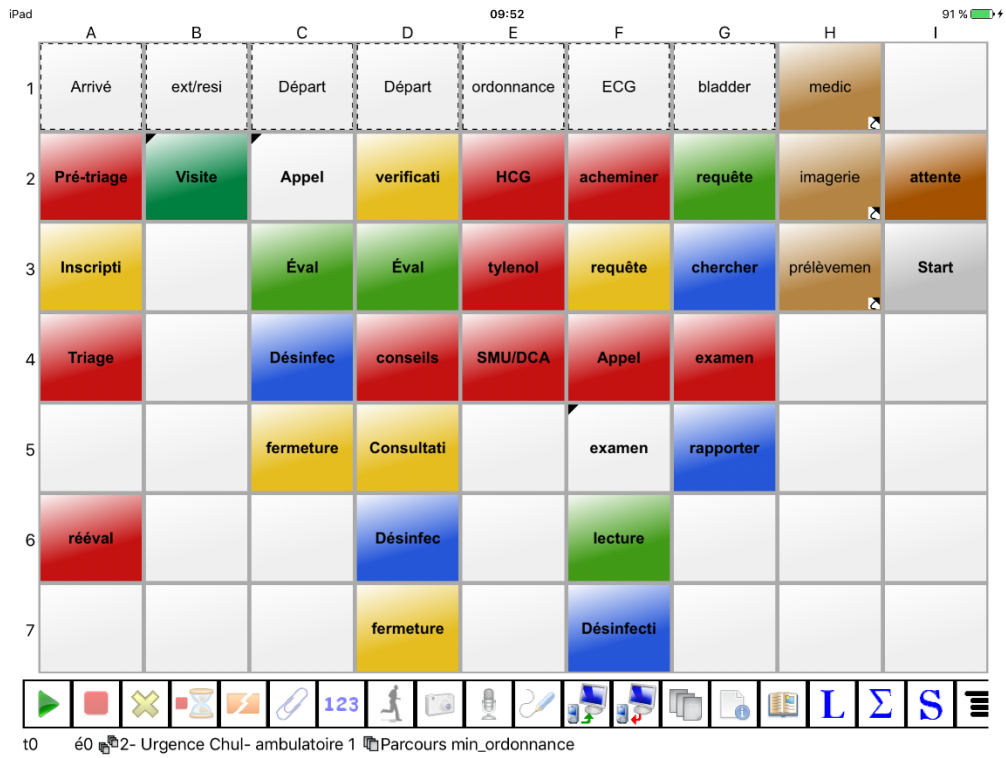

Web-Appendix 3.

**Calculation of the unit cost (\$Can) of nurses in the CHUL emergency department for 2015–2016**

$$\frac{\text{Total annual expenses for ED nurses}}{\text{Total annual minutes of availability to patient care (ED nurses)}} = \frac{\$8,414,750.92}{8,226,060 \text{ min}} = 1.02 \text{ \$/min}$$

\*Expenses include salaries, training stipends and benefits.

\*\*Minutes exclude vacations, meetings and breaks.

\*\*\*As care providers can be assigned on a given day to any area of the ED, the unit costs calculated using this formula apply to care procedures performed throughout the ED (resuscitation, stretcher or ambulatory care areas).

Web-Appendix 4.

**Calculation of the cost per minute (\$Can) of consumable supplies used in the CHUL emergency department during fiscal year 2015–2016**

$$\frac{\text{Total annual cost of consumables}}{\text{Total annual minutes of availability to patient care (All ED professionals)}} = \frac{\$1,377,938.70}{15,162,187 \text{ min}} = 0.09 \text{ \$/min}$$

\*Consumables include all disposal supplies (e.g. needles, masks, swabs).

\*\* Minutes exclude vacations, meetings and breaks.

\*\*\* The cost per minute of consumables is calculated independently of the area of the ED where they were used because these consumables are not traceable.

Web-Appendix 5.

**Calculation of overhead cost per minute (\$Can) in the CHUL emergency department during fiscal year 2015–2016**

$$\frac{\text{Annual overheads allocated to the ED}}{\text{Total annual minutes of availability to patient care (All ED professionals)}} = \frac{\$3,392,033.45}{15,162,187 \text{ min}} = 0.22 \text{ \$/min}$$

\*Overhead expenses include institutional fixed and variable costs (e.g. human resources) imputed to the ED.

\*\* Minutes exclude vacations, meetings and breaks.

\*\*\*The cost per minute of overhead can be applied to the cost of patient care in any ED area.

Web-Appendix 6.

**Example of a care procedure cost (blood tests) calculated using time-driven activity-based costing (\$Can)**

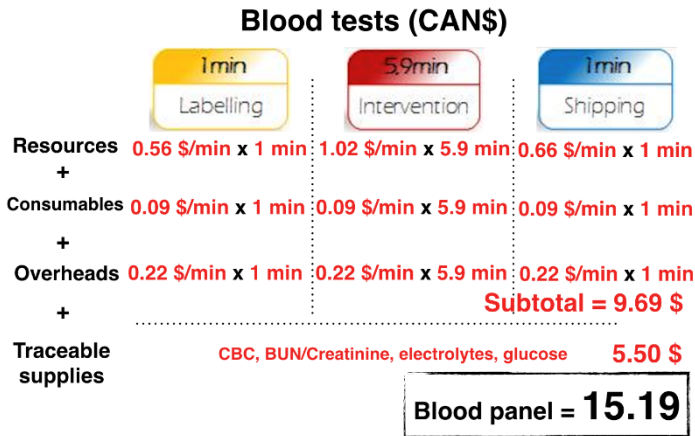

Web-Appendix 7. Process maps

# Upper respiratory tract infection

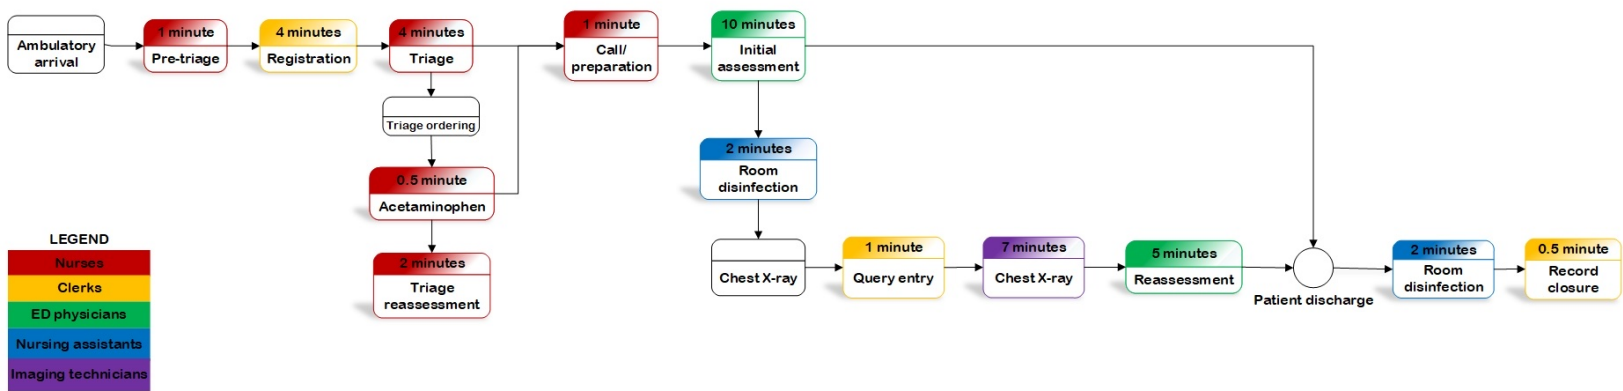

\*Process durations estimated by a panel of experts.

# Urinary tract infection

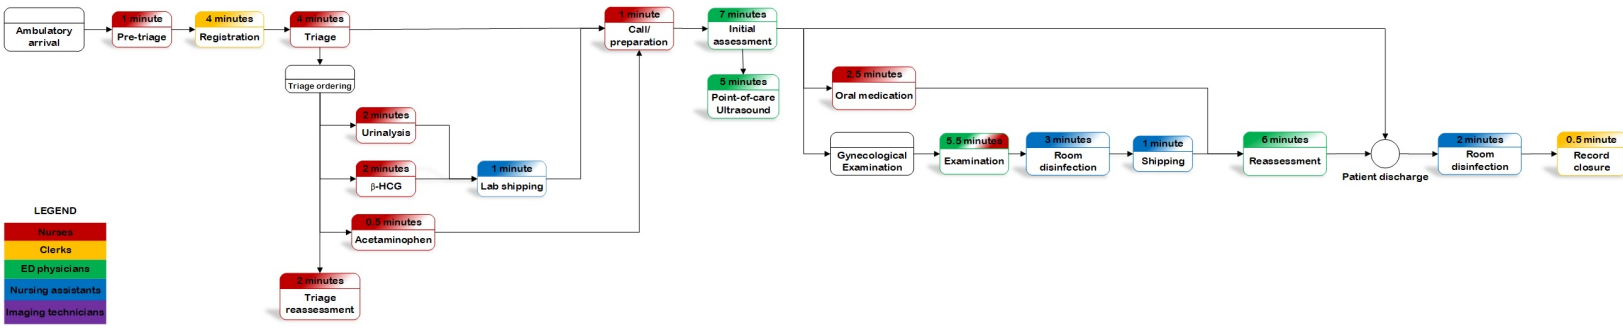

\*Process durations estimated by a panel of experts.

Unspecified abdominal pain

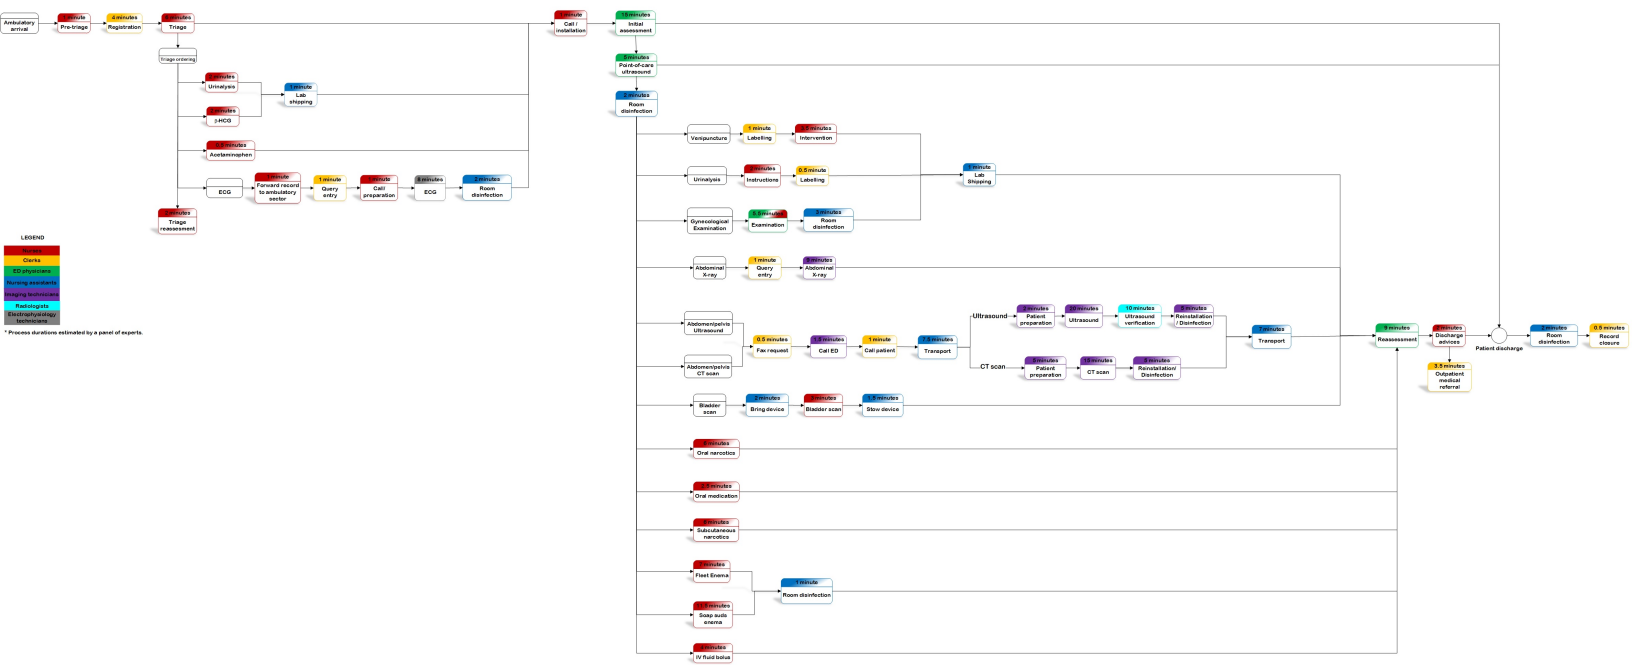

LEGEND  
 Ambulatory arrival  
 Call notification  
 Initial assessment  
 Patient care / Ultrasound  
 Transport  
 Patient discharge  
 Room distribution  
 Lab shipping  
 ECG  
 Forward tracing to ambulatory center  
 Query entry  
 Call preparation  
 ECG  
 Room distribution  
 Transport  
 Reassessment  
 Discharge advice  
 Patient discharge  
 Room distribution  
 Record closure

\*Success scenarios estimated by a panel of experts.



# Low back pain

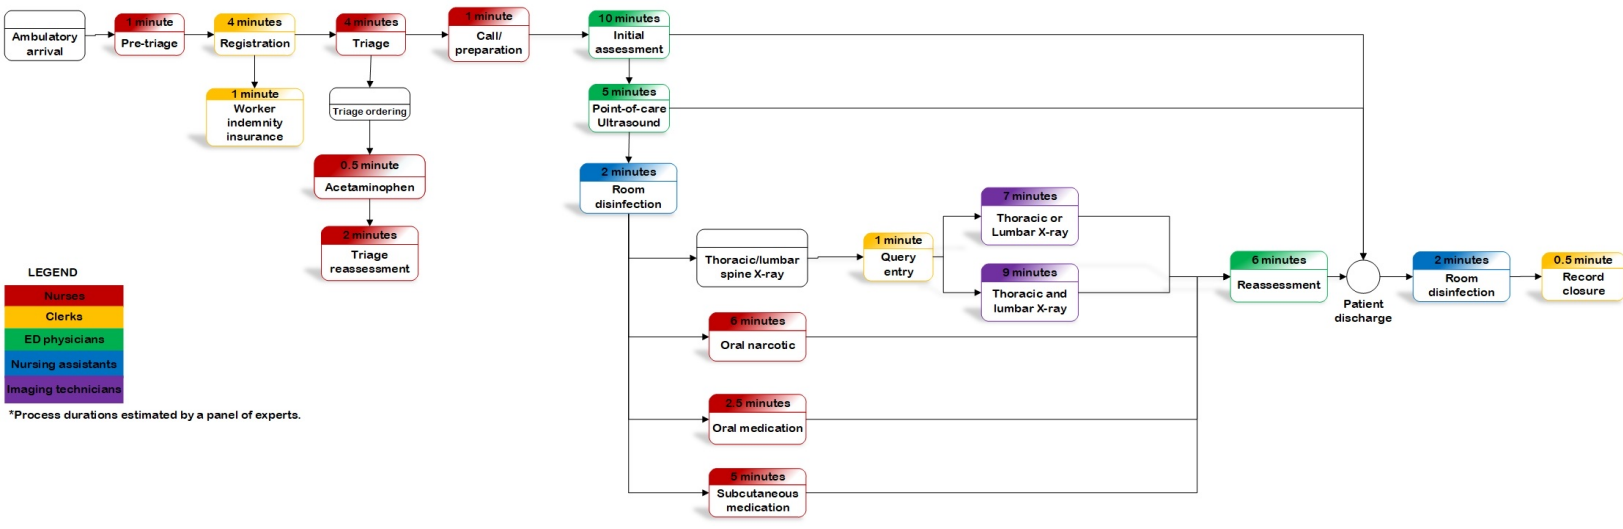

- LEGEND**
- Nurses
  - Clerks
  - ED physicians
  - Nursing assistants
  - Imaging technicians

\*Process durations estimated by a panel of experts.

# Superficial limb lacerations

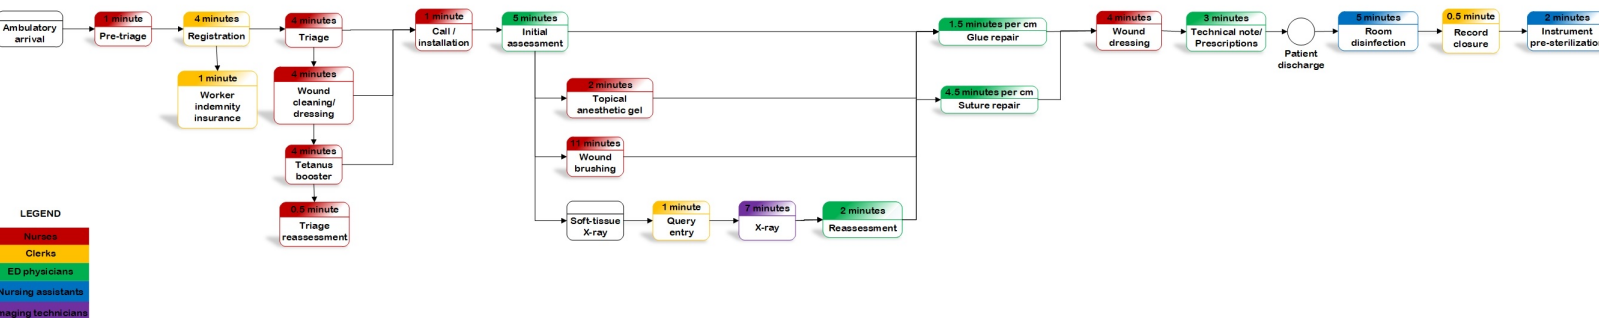

\*Process durations estimated by a panel of experts.

Web-appendix A8.

**Summary of expenditures (\$CAN) on consumables at the CHUL, 2015-2016**

| <b>General management<br/>(CHU de Québec-Université<br/>Laval)</b> | <b>Department (CHUL)</b> | <b>Resources involved</b>         | <b>\$ (department)</b> |
|--------------------------------------------------------------------|--------------------------|-----------------------------------|------------------------|
| General Management Emergencies                                     | Emergency                | Nurses, clerk, nursing assistants | 1,377,938              |
| Medical direction of hospital services                             | Medical Imaging          | Imaging technicians               | 1,766,128              |
| Multidisciplinary services direction                               | Respiratory Therapy      | Respiratory therapist             | 5,464                  |

**Summary of overhead expenses (\$CAN) at the CHUL, 2015-2016**

| Category                                                                     | \$ (hospital)     | Allocation rule*                                                                     | \$ (ED)†         |
|------------------------------------------------------------------------------|-------------------|--------------------------------------------------------------------------------------|------------------|
| General administration                                                       | 8,242,491         | Proportion of the ED budget to the hospital budget                                   | 112,259          |
| Financial administration                                                     | 8,342,295         |                                                                                      | 113,618          |
| Staff administration service                                                 | 3,923,829         |                                                                                      | 53,441           |
| Technical services administration                                            | 2,189,678         |                                                                                      | 29,822           |
| IT department                                                                | 14,082,100        |                                                                                      | 191,791          |
| Human resources management                                                   | 10,134,119        |                                                                                      | 157,190          |
| Supplies and services                                                        | 4,256,013         |                                                                                      | 83,000           |
| Telecommunication                                                            | 3,686,659         |                                                                                      | 70,979           |
| Transportation to home or long-term facility for patients 65 years and older | 719,367           | Attributed entirely to the ED                                                        | 719,367          |
| Archives                                                                     | –                 | \$8.91 per ED visit (75,929 visits in 2015-2016)                                     | 676,527          |
| Food services                                                                | –                 | \$5.67 per meal (44,642 meals)                                                       | 252,100          |
| Laundry                                                                      | 1,316,997         | Proportion of ED laundry trolleys per day to the hospital laundry trolleys per day   | 263,399          |
| Hygiene and sanitation - operational tasks                                   | 4,415,187         | Proportion of ED surface area to the hospital surface area (m <sup>2</sup> )         | 163,008          |
| Hygiene and sanitation - functional tasks                                    | 331,106           |                                                                                      | 12,224           |
| Operation of the installations                                               | 4,730,723         |                                                                                      | 103,864          |
| Biomedical waste management                                                  | 290,804           | Proportion of ED biomedical waste mass to the hospital biomedical waste mass         | 11,632           |
| Security                                                                     | 1,376,246         | Proportion of ED volumetric space to the hospital volumetric space (m <sup>3</sup> ) | 38,047           |
| Maintenance (building, equipment and furniture)                              | 6,832,644         |                                                                                      | 168,835          |
| Direction of social services                                                 | 172,929           | Attributed entirely to the ED                                                        | 172,929          |
| <b>Total</b>                                                                 | <b>75,971,814</b> |                                                                                      | <b>3,392,033</b> |

\*Unless otherwise indicated, ED overhead cost = “hospital overhead cost” x “fraction allocated to the ED”

†Overhead is allocated to the care of the whole population of ambulatory patients with acute conditions since all are treated in the same facility area by the same care providers. Using time-driven activity-based costing, overhead costs are then allocated to the care of each ambulatory patient based on the estimated time of contact between the patient and care resources.
